# Supplementary material for: The effect of sonication treatment of graphene oxide on the mechanical properties of the assembled films
Source: Royal Society of Chemistry journal article supplement (doi:10.1039/c6ra03996k), 2016-01-01
Supplement: c6ra03996k1.pdf [file c6ra03996k1.pdf]

*Supplementary Information for*

**The effect of sonication treatment of graphene oxide on the mechanical properties of the assembled films**

Shibing Ye, and Jiachun Feng\*

State Key Laboratory of Molecular Engineering of Polymers, Department of Macromolecular Science and Laboratory of Advanced Materials, Fudan University, Shanghai 200433, China.

\*Corresponding author, E-mail: [jcfeng@fudan.edu.cn](mailto:jcfeng@fudan.edu.cn); Tel: +86 21 6564 3735

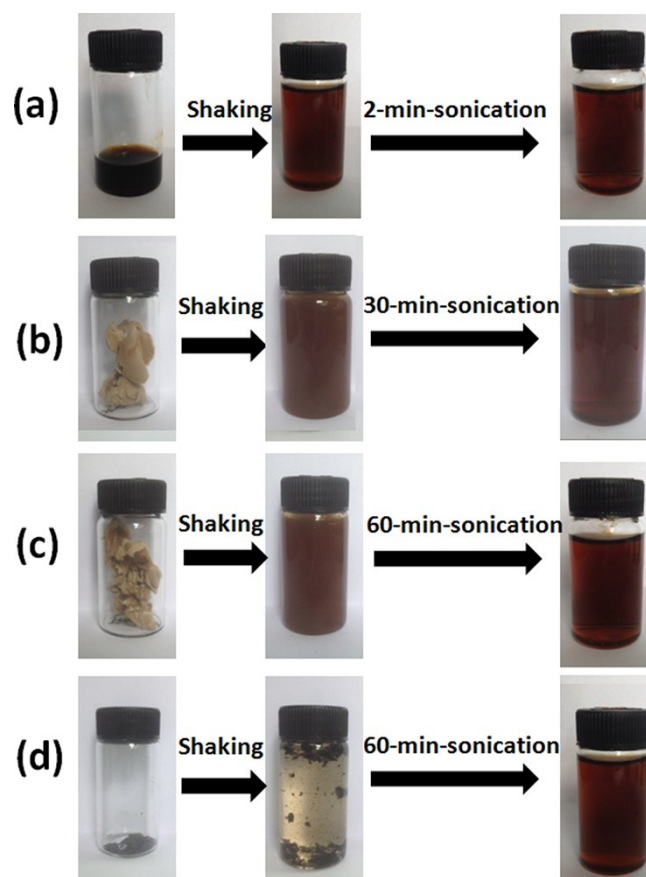

**Fig. S1** Photographs showing the dispersion and sonication of GiO in different forms in the aqueous solutions: (a) GiO solution, (b-c) FDGO powder, and (d) VDGO powder.

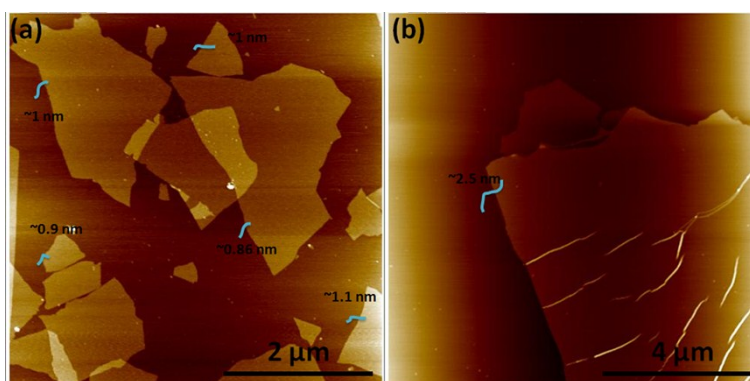

**Fig. S2** AFM images of (a) exfoliated GO sheets and (a) incompletely exfoliated GiO flakes.

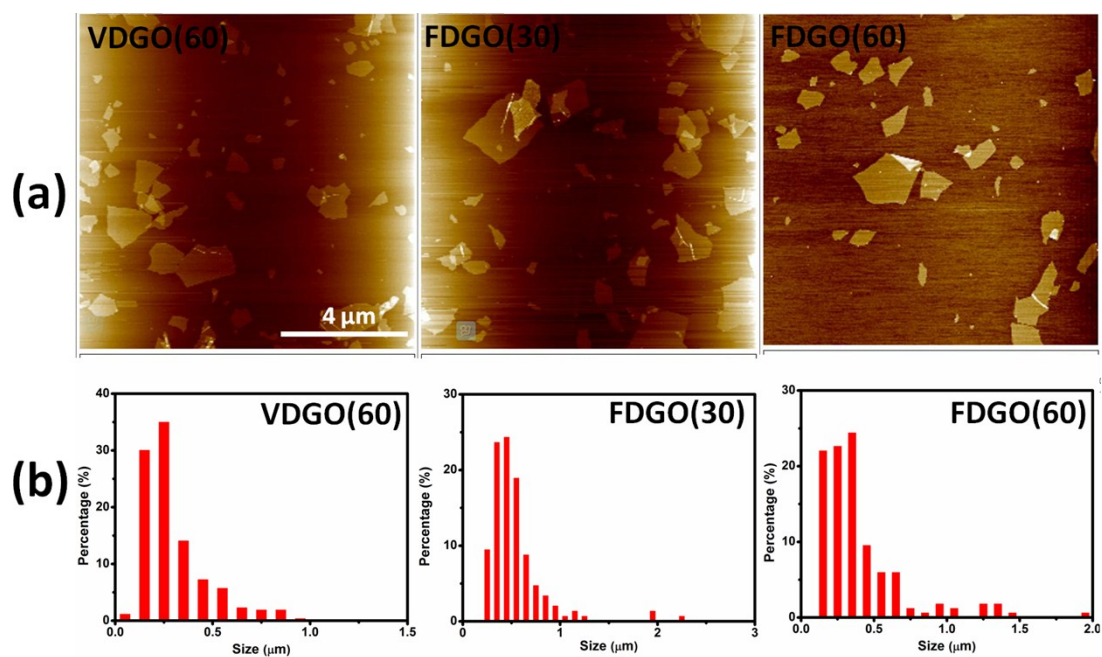

**Fig. S3** (a) AFM images and (b) the histograms of size distribution of VDGO(60), FDGO(30), and FDGO(60) sheets.

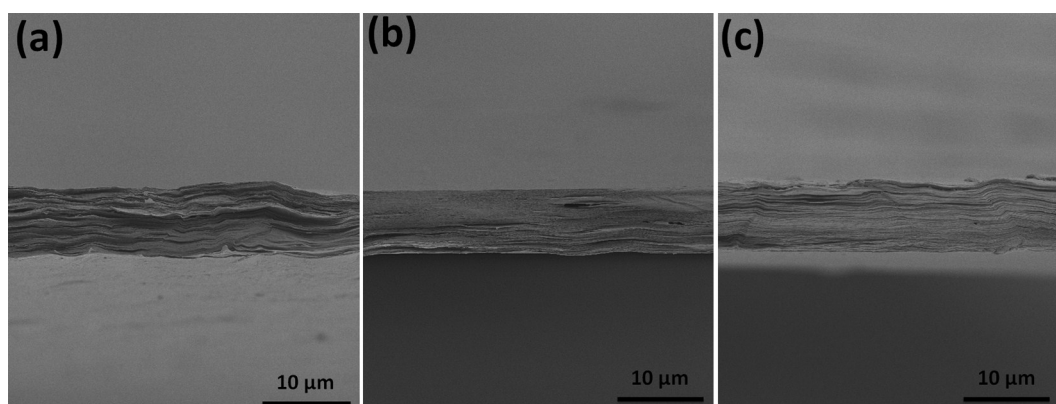

**Fig. S4** SEM images of the fracture surfaces of the VDGO(60), FDGO(30), and FDGO(60).

**Table S1.** Statistical results of the relevant parameters of sonication and the mechanical properties of the final GOFs.

| GiO forms          | Sonication instruments         | Sonication time (min) | Power (W)/<br>Frequency (kHz) | Tensile strength (Mpa) | Elongation (%) | Ref. |
|--------------------|--------------------------------|-----------------------|-------------------------------|------------------------|----------------|------|
| Not Mentioned (NM) | Fisher Scientific FS60         | 60                    | 150/—                         | 120                    | 0.6            | [11] |
| Solution           | Branson Digital Sonifier S450D | 30                    | 500/—                         | 150                    | 0.85           | [14] |
| Solution           | Fisher Scientific FS60         | NM                    | 150/—                         | 81.9                   | 0.4            | [13] |
| Solution           | Fisher Scientific FS60         | 60                    | 150/—                         | 149.4                  | 1.65           | [18] |
| NM                 | Vibra-Cell VC 505              | NM                    | 500/—                         | 130                    | 1.4            | [12] |
| Solution           | —                              | NM                    | —                             | 62.3                   | 2.3            | [37] |
| Powder             | —                              | 30                    | —                             | 97.4                   | 0.83           | [15] |
| Powder             | —                              | 60                    | —                             | 95.4                   | 0.39           | [24] |
| Solution           | —                              | 5-10                  | —                             | 170.2                  | 0.43           | [16] |
| Solution           | —                              | NM                    | —                             | 190                    | 1.74           | [20] |
| Solution           | —                              | 30                    | —                             | 34.3                   | 2.61           | [21] |
| Solution           | —                              | NM                    | —                             | 86.9                   | 0.98           | [19] |
